# Supplementary material for: The Early Terrestrial Fungal Lineage of Conidiobolus—Transition from Saprotroph to Parasitic Lifestyle
Source: MDPI journal article supplement (doi:10.3390/jof8080789), 2022-07-28
Supplement: s1 [file s1]

**Supplementary Table S1.** Taxa used for phylogenetic and ancestral state reconstructions, their pores and lifestyle.

| Species new and old name, reference                                                                                                  | Lifestyle, range                                                                     |            | Primary conidia size in $\mu\text{m}$ | Secondary conidia                 |
|--------------------------------------------------------------------------------------------------------------------------------------|--------------------------------------------------------------------------------------|------------|---------------------------------------|-----------------------------------|
|                                                                                                                                      | substrate                                                                            | host range |                                       |                                   |
| <b><u>Capillidium adiaeretur</u></b> = <i>Conidiobolus adiaeretus</i> (Nie et al. 2020)                                              | Organic detritus and plant debris 0                                                  |            | Globose 15-45x13-42 1                 | Microconidia & capilliconidia 2   |
| <b><u>Capillidium bangaloreense</u></b> = <i>Conidiobolus bangalorensis</i> (Balazy 1993)                                            | Soil and litter 0                                                                    |            | Subglobose to pyriform 20-25x13-16 2  | Like primaries 1                  |
| <b><u>Capillidium denaesporum</u></b> = <i>Conidiobolus denaesporus</i> (Drechsler 1957, King 1976, Nie et al. 2020, Index Fungorum) | Organic detritus 0                                                                   |            | Globose to turbinate 6-21x13-32 1     | Capilliconidia 2                  |
| <b><u>Capillidium heterosporum</u></b> = <i>Conidiobolus heterosporus</i> (Nie et al. 2020, ARSEF) [T]                               | Organic detritus 0                                                                   |            | Globose to subglobose 12-37x11-31 1   | Like primaries & capilliconidia 2 |
| <b><u>Capillidium lobatum</u></b> = <i>Conidiobolus lobatus</i> (Balazy 1993)                                                        | Organic detritus 0                                                                   |            | Globose 21-26x20-24 1                 | -/- 2                             |
| <b><u>Capillidium pumilum</u></b> = <i>Conidiobolus pumilus</i> (ibid., ARSEF)                                                       | Organic detritus 0                                                                   |            | Subglobose to turbinate 9-32x6-25 2   | -/- 2                             |
| <b><u>Capillidium rhyzosporem</u></b> = <i>Conidiobolus rhyzosporem</i> (ibid.)                                                      | Organic detritus 0                                                                   |            | Subglobose 22-36x18-30 1              | -/- 2                             |
| <i>Conidiobolus brefeldianus</i> (Balazy 1993)                                                                                       | Contaminant of fungi 1                                                               |            | Subglobose 21-36x10-31 1              | Microconidia 1                    |
| <i>Conidiobolus chlamydosporus</i> (Drechsler, 1955c) syn. of <i>C. firmipilleus</i> according to Balazy (1993), Nie et al. (2020)   | Organic detritus 0                                                                   |            | globose 25 1                          | -/- 1                             |
| <b><u>Conidiobolus coronatus</u></b> (Batko 1964, Balazy 1993, Nie et al. 2020, ARSEF)                                               | Organic detritus & dead & living insects, fungi & warm-blooded animals, wide range 2 |            | Globose 36-52x42-65 1                 | -/- 1                             |
| <i>Conidiobolus dabieshanensis</i> (Nie et al. 2017, Index Fungorum)                                                                 | Organic detritus 0                                                                   |            | Globose to subglobose 33-45x20-38 1   | Like primaries 1                  |
| <b><u>Conidiobolus firmipilleus</u></b> (Balazy 1993, ARSEF)<br><i>C. chlamydosporus</i> synonym to this species                     | Organic detritus & insects, narrow range 3                                           |            | Subspherical 8-50x7-45 1              | Microconidia 1                    |
| <i>Conidiobolus gonimodes</i> (Drechsler 1961)                                                                                       | Organic detritus 0                                                                   |            | Globose 11-33x12-39 1                 | -/- 0                             |
| <b><u>Conidiobolus incongruus</u></b> (Balazy 1993)                                                                                  | Organic detritus & warm-blooded animals 1                                            |            | Globose to ellipsoid 12-42x11-37 1    | -/- 1                             |
| <i>Conidiobolus iuxtagenitus</i> (Nie et al. 2020, Index Fungorum, ARSEF)                                                            | Organic detritus & alive insects, narrow range 3                                     |            | Globose 30-45x16-22 1                 | Like primaries & microconidia 1   |
| <i>Conidiobolus khandalensis</i> (Balazy 1993, Nie et al. 2020)                                                                      | Organic detritus 0                                                                   |            | Globose to subglobose 17-21x14-18 0   | Microconidia 1                    |
| <b><u>Conidiobolus lamprauges</u></b> (Balazy 1966, Nie et al. 2020)                                                                 | Organic detritus & flies infected with <i>E. muscae</i> 0                            |            | Globose to ovoid 13-20x15-22 0        | Unknown 3                         |
| <i>Conidiobolus lichenicola</i> (Srinivasan & Thiralachar 1968)                                                                      | Decomposing lichens 1                                                                |            | Pyriform 30x35 1                      | -/- 1                             |
| <i>Conidiobolus macrosporus</i> (Balazy 1993)                                                                                        | Organic detritus & living fungus                                                     |            | Globose to pyriform 25-               | Microconidia 1                    |

|                                                                                                                                              |                                                                |                                   |                                          |
|----------------------------------------------------------------------------------------------------------------------------------------------|----------------------------------------------------------------|-----------------------------------|------------------------------------------|
|                                                                                                                                              | gnats, narrow range 3                                          | 54x30-50 3                        |                                          |
| <b><i>Conidiobolus megalotocus</i></b> (ibid.)                                                                                               | Organic detritus 0                                             | Globose 12-55x10-48 1             | -/- 1                                    |
| <u><i>Conidiobolus mycophagus</i></u> (Srinivasan & Thiralachar 1965)                                                                        | Decomposing fungi 1                                            | Globose 25-33x35-40 1             | Microconidia or like globose primaries 1 |
| <u><i>Conidiobolus mycophilus</i></u> (Balazy 1993, Index Fungorum)                                                                          | Decomposing fungi 1                                            | Subglobose 25-40x20-33 1          | Microconidia 1                           |
| <u><i>Conidiobolus obscurus</i></u> (Balazy 1993, ARSEF)                                                                                     | Living aphids, narrow range, weak 3                            | Globose 29-34 1                   | Like primaries 1                         |
| <u><i>Conidiobolus polyspermus</i></u> (Drechsler 1961, Index Fungorum)                                                                      | Organic detritus 0                                             | Globose 12-48x15-55 1             | Unknown 3                                |
| <b><i>Conidiobolus polytocus</i></b> (Drechsler 1955c)                                                                                       | Organic detritus 0                                             | Subspherical 14-29x12-25 1        | Microconidia 1                           |
|                                                                                                                                              |                                                                |                                   |                                          |
| <u><i>Neoconidiobolus couchii</i></u> = <i>Conidiobolus couchii</i> (Balazy 1993)                                                            | Organic detritus 0                                             | Ovoid 13-27x10-16 2               | Like primaries or elongate 2             |
| <u><i>Neoconidiobolus lachnodes</i></u> = <i>Conidiobolus lachnodes</i> (ibid.)                                                              | Organic detritus & forest litter 3                             | Globose 10-27x8-25 0              | Like primaries 1                         |
| <u><i>Neoconidiobolus mirabilis</i></u> = <i>Conidiobolus mirabilis</i> (Nie et al. 2018, Index Fungorum)                                    | Organic detritus 0                                             | Subglobose 21-28x17-21 1          | -/- 1                                    |
| <u><i>Neoconidiobolus osmodes</i></u> = <i>Conidiobolus osmodes</i> (Balazy 1993, ARSEF)                                                     | Organic detritus & dead insects & living insects, wide range 2 | Globose to ovoid 25-37x22-30 2    | -/- 1                                    |
| <u><i>Neoconidiobolus pachyzygosporus</i></u> = <i>Conidiobolus pachyzygosporus</i> (Nie et al. 2018, Index Fungorum)                        | Organic detritus 0                                             | Globose 16-23x11-18 0             | -/- 1                                    |
| <u><i>Neoconidiobolus sinensis</i></u> = <i>Conidiobolus sinensis</i> (Nie et al. 2012)                                                      | Organic detritus 0                                             | Globose to pyriform 18-25x23-33 2 | -/- 1                                    |
| <u><i>Neoconidiobolus stilbeus</i></u> = <i>Conidiobolus stilbeus</i> (Nie et al. 2016, Index Fungorum)                                      | Organic detritus 0                                             | Globose 21-25x17-21 1             | -/- 1                                    |
| <u><i>Neoconidiobolus stromoideus</i></u> = <i>Conidiobolus stromoideus</i> (Balazy 1993)                                                    | Organic detritus & fly infected with <i>E. muscae</i> 0        | Globose to pyriform 21-39x18-35 2 | -/- 1                                    |
| <u><i>Neoconidiobolus thromboides</i></u> = <i>Conidiobolus thromboides</i> (ibid.)                                                          | Organic detritus, fungi & dead & living insects, wide range 2  | Globose 24-32x18-27 1             | -/- 1                                    |
| <u><i>Neoconidiobolus vermicola</i></u> = <i>Macrobotophthora vermicola</i> (McCulloch 1977, Balazy 1993, Nie et al. 2020)                   | Nematodes 3                                                    | Obovoid 16-22x9-14 2              | Secondaries occur but not described 2    |
|                                                                                                                                              |                                                                |                                   |                                          |
| <u><i>Microconidiobolus nodosus</i></u> = <i>Conidiobolus nodosus</i> (Index Fungorum)                                                       | Organic detritus 0                                             | Globose 13-16x17-22 0             | -/- 1                                    |
| <b><i>Microconidiobolus paulus</i></b> = <i>Conidiobolus paulus</i> (Balazy 1993, ARSEF) <i>C. undulatus</i> is a synonym of this species    | Organic detritus 0                                             | Globose or ovoid 5-10x4-17 0      | Like primaries 1                         |
| <u><i>Microconidiobolus terrestris</i></u> = <i>Conidiobolus terrestris</i> (Srinivasan & Thiralachar 1968, Nie et al. 2020, Index Fungorum) | Organic detritus 0                                             | Globose 8-12 0                    | -/- 0                                    |
|                                                                                                                                              |                                                                |                                   |                                          |

|                                                                       |                  |                                                |                                |
|-----------------------------------------------------------------------|------------------|------------------------------------------------|--------------------------------|
| <u>Batkoa apiculata</u> (Balazy 1993)                                 | Living insects 2 | Globose 29-34x28-35 1                          | -//- 1                         |
| <u>Batkoa gigantea</u> (ibid.)                                        | -//- 2           | Globose 92x77 1                                | -//- 1                         |
| <u>Batkoa major</u> (ibid.)                                           | -//- 2           | Spherical to pyriform 48-52x41-47 1            | -//- 1                         |
|                                                                       |                  |                                                |                                |
| <u>Entomophaga aulicae</u> (ibid.)                                    | -//- 2           | Pyriform and obovoid 29-38x20-30 2             | -//- 2                         |
| <u>Entomophaga conglomerata</u> (ibid.) = <u>Batkoa apiculata</u>     | -//- 2           | Broadly pear-shaped 40-48x29-35 2              | -//- 2                         |
| <u>Entomophaga maimaga</u> (ibid.)                                    | -//- 2           | Pyriform 26x21 2                               | -//- 2                         |
|                                                                       |                  |                                                |                                |
| <u>Entomophthora chromaphidis</u> (Humber and Feng 1991, Keller 2002) | -//- 2           | Campanulate 12-16x16-14 1                      | -//- 2                         |
| <u>Entomophthora culicis</u> (Balazy 1993)                            | -//- 2           | Campanulate 11-16x7-12 1                       | -//- 2                         |
| <u>Entomophthora grandis</u> (Keller 2002)                            | -//- 2           | Campanulate 10-32x24-26 1                      | -//- 2                         |
| <u>Entomophthora muscae</u> (Balazy 1993)                             | -//- 2           | Campanulate 20-32x15-28 1                      | -//- 2                         |
| <u>Entomophthora planchoniana</u> (ibid.)                             | -//- 2           | Campanulate 15-20x13-17 1                      | -//- 2                         |
| <u>Entomophthora scatophagae</u> (Steinkraus & Kramer 1988)           | -//- 2           | Campanulate 29x23 1                            | -//- 2                         |
| <u>Entomophthora schizophorae</u> (Balazy 1993)                       | -//- 2           | Campanulate 17-25x12-22 1                      | -//- 2                         |
| <u>Entomophthora syrphi</u> (Balazy 1993, Keller 2002)                | -//- 2           | Campanulate 28-32x21-27 1                      | -//- 2                         |
| <u>Entomophthora thripidi</u> (Balazy 1993)                           | -//- 2           | Campanulate 10-15x8-12 1                       | -//- 2                         |
|                                                                       |                  |                                                |                                |
| <u>Erynia conica</u> (ibid.)                                          | -//- 2           | Fusiform to conical 27-80x12-14 2              | Like primaries or tetradiate 2 |
| <u>Erynia ovispora</u> (ibid.)                                        | -//- 2           | Ovoid or ellipsoid 23-29x12-14 2               | Like primaries 2               |
| <u>Erynia rhizospora</u> (Thaxter 1988, Balazy 1993)                  | -//- 2           | Oblong clavate to crescent-shaped 30-35x8-10 2 | Like primaries or spherical 2  |
| <u>Erynia sciarae</u> (Balazy 1993)                                   | -//- 2           | Ovoid to turbinate 18-25x12-16 2               | Unknown 3                      |

|                                                        |        |                                               |                                                          |
|--------------------------------------------------------|--------|-----------------------------------------------|----------------------------------------------------------|
| <u>Eryniopsis caroliniana</u> (ibid.)                  | -//- 2 | Oblong ovoid or cylindrical 22-51x11-19 2     | Like ovoid primaries 2                                   |
| <u>Furia americana</u> (ibid.)                         | -//- 2 | Oblong ovoid 28-30x14 2                       | Like primaries 2                                         |
| <u>Furia gastropachae</u> (ibid., Filotas et al. 2003) | -//- 2 | Oblong ovoid 17-25x7-12 2                     | More globose than primaries 2                            |
| <u>Furia ithacensis</u> (Balazy 1993)                  | -//- 2 | Narrow ovoid to ellipsoid 15-24x9-12 2        | More ovoid than primaries 2                              |
| <u>Furia neopyralidarum</u> (ibid.)                    | -//- 2 | Pyriform or ovoid 16-28x12-17 2               | Like primaries 2                                         |
| <u>Furia pieris</u> (ibid.)                            | -//- 2 | Ovoid 21-32x12-24 2                           | Like primaries but more ovoid 2                          |
| <u>Furia virescens</u> (ibid.)                         | -//- 2 | Elongate cylindric or claviform 28-29x10-11 2 | Shorter and broader than primaries with convex papilla 2 |
| <u>Massospora cicadina</u> (Soper 1974)                | -//- 2 | Ovoid & verrucose 10-17x14-20 2               | Absent 3                                                 |
| <u>Massospora platypedia</u> (Macias et al. 2020)      | -//- 2 | Ovoid & verrucose 11-18x15-20 2               | Absent 3                                                 |
| <u>Pandora blunckii</u> (Balazy 1993)                  | -//- 2 | Pyriform or ovoid 15-18x7-9 2                 | Like primaries 2                                         |
| <u>Pandora delphacis</u> (ibid.)                       | -//- 2 | Ovoid to ellipsoidal 29-36x13-18 2            | Ovoid 2                                                  |
| <u>Pandora dipterigena</u> (ibid.)                     | -//- 2 | Elongate, variable shape 22-30x11-15 2        | Ovoid to somewhat pear-shaped 2                          |
| <u>Pandora kondoiensis</u> (ibid.)                     | -//- 2 | Narrow ellipsoid 16-21x10-12 2                | Ovoid or short pyriform 2                                |
| <u>Pandora neoaphidis</u> (ibid.)                      | -//- 2 | Ovoid or ellipsoid 21-32x11-14 2              | Like primaries but more variable 2                       |
| <u>Zoophthora anglica</u> (ibid.)                      | -//- 2 | Cylindric 23-30x9-10 2                        | Capilliconidia or like primaries 2                       |
| <u>Zoophthora lanceolata</u> (ibid.)                   | -//- 2 | Ellipsoid or cylindrical 15-21x5-7 2          | -//- 2                                                   |
| <u>Zoophthora phalloides</u> (ibid.)                   | -//- 2 | Cylindrical 23-25x7-8 2                       | Capilliconidia or like primaries but shorter 2           |

|                                                                    |                               |                                            |                                    |
|--------------------------------------------------------------------|-------------------------------|--------------------------------------------|------------------------------------|
| <i>Zoophthora radicans</i> (Balazy 1993, Keller 1991)              | -//- 2                        | Subcylindrical to subfusiform 20-23x6 2    | Capilliconidia or like primaries 2 |
|                                                                    |                               |                                            |                                    |
| <i>Strongwellsea castrans</i> (Balazy 1993, Eilenberg et al. 2020) | -//- 2                        | Elongate ovoid 25-33x12-19 2               | Ellipsoid or subglobose 2          |
| Outgroup taxa                                                      |                               |                                            |                                    |
| <i>Coemansia reversa</i> (Young 1973)                              | Organic detritus 0            | Non-forcible ovoid sporangiospore 4x2 3    | Absent 0                           |
| <i>Schizangiella serpentis</i> (Dwyer et al. 2006)                 | Animals 3                     | Unknown 3                                  | Unknown 3                          |
| <i>Smittium culisetiae</i> (Wang et al. 2013)                      | Commensal of living insects 2 | Non-forcible trichospore 16x4 3            | Absent 0                           |
| <i>Syncephalis pseudoplumgaleata</i> (Lazarus et al. 2017)         | Contaminant of fungi 1        | Non-forcible variously shaped merospores 3 | Absent 0                           |

-//- – same as above.

Lifestyle: non-pathogenic to insects, grow well on artificial media (0), insect pathogen-generalist, grow well on artificial media (1), insect pathogen of wide range (2), insect pathogen of narrow range (3).

Primary conidia: forcible up to and equal to 20 µm in diameter – small (0), forcible >20 in diameter – large (1), forcible other than round (2), not forcible or unknown (3).

Secondary conidia: absent (0), microconidia (1), presence of capilliconidia or other shape than globose (2), unknown (3).

In bold – genomes or transcriptomes available, underlined – taxa used in Nie et al. phylogeny (2020).

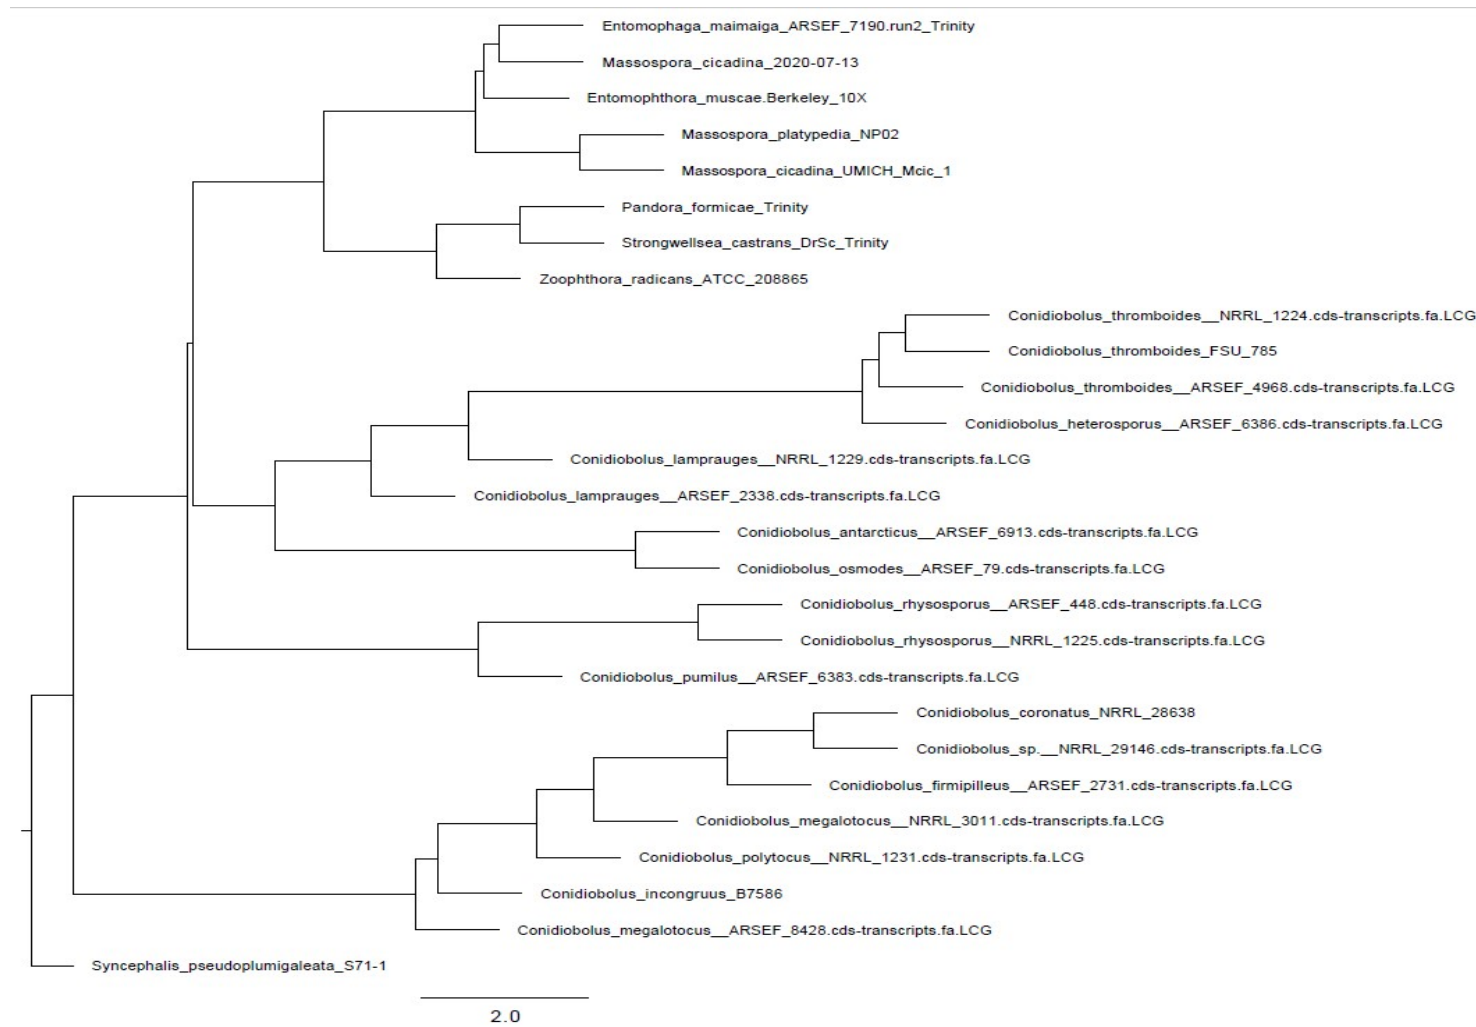

**Supplemental Figure S1.** Phylogeny based on 27 genomes of *Conidiobolus*-like fungi. Major clades correspond to the families *Conidiobolaceae*, *Neoconidiobolaceae* and *Capillidiuaceae* (from the bottom up). Outgroup *Syncephalis pseudoplumigaleata* S71-1.

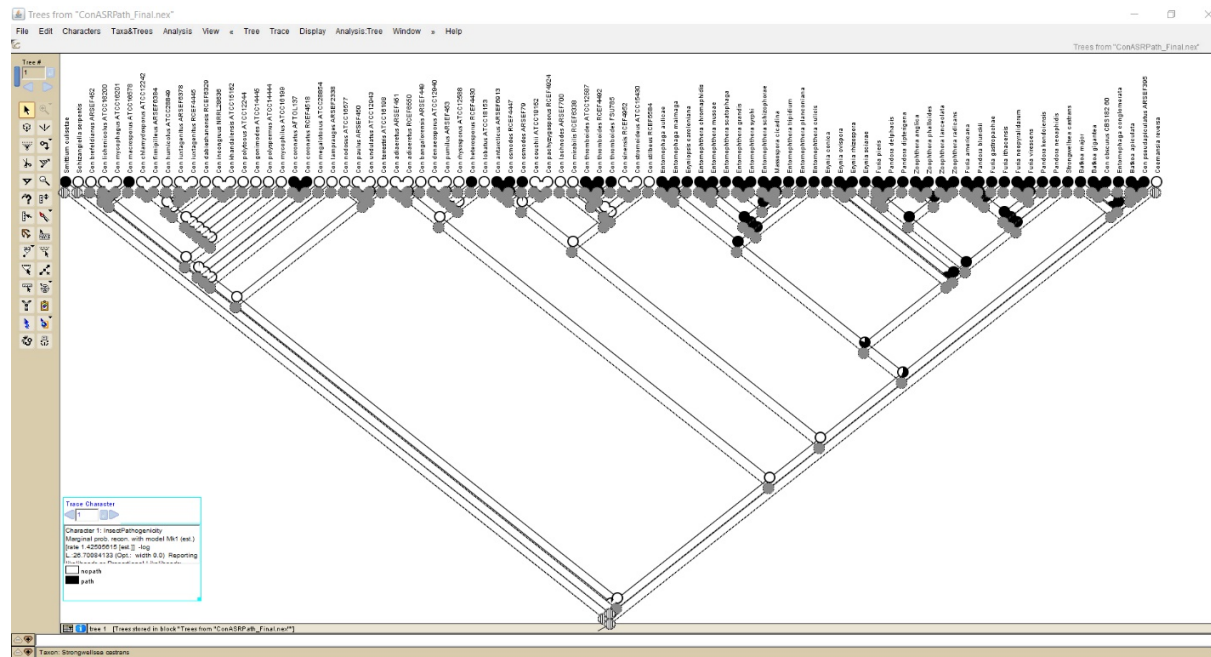

**Supplemental Figure S2.** Ancestral state reconstruction of insect-pathogenic lifestyle and ballistic conidia (gray), which evolutionary precedes parasitic lifestyle (black) for two states: present (black) and absent (white).
